# Supplementary material
Source: PubMed Central journal article supplement (PMC6871192)
Supplement: NIHMS1059158-supplement-SI.pdf [file NIHMS1059158-supplement-SI.pdf]

## **Supplementary Information**

### ***Burkholderia* as a Source of Natural Products**

Sylvia Kunakom and Alessandra S. Eustáquio\*

Department of Medicinal Chemistry and Pharmacognosy and Center for Biomolecular Sciences,  
College of Pharmacy, University of Illinois at Chicago, Chicago, IL 60607, USA

\*Corresponding author: Tel.: (312) 413-7082. Email: [ase@uic.edu](mailto:ase@uic.edu)

**Table S1. Natural products isolated from *Burkholderia sensu lato***

| Class                 | Compound                                                               | Source                                                        | Discovery method   | Bioactivity                                     | Reference(s) |
|-----------------------|------------------------------------------------------------------------|---------------------------------------------------------------|--------------------|-------------------------------------------------|--------------|
| Nonribosomal peptides | Pyochelin                                                              | <i>B. cepacia</i>                                             | Bioactivity-guided | Iron chelating                                  | [1-3]        |
|                       | Aeruginaldehyde                                                        | <i>B. cepacia</i>                                             | Other              | Antifungal, byproduct of pyochelin biosynthesis | [4,5]        |
|                       | Fragin                                                                 | <i>B. cenocepacia</i>                                         | Genome mining      | Antifungal, metal chelating                     | [6]          |
|                       | Valdiazin                                                              | <i>B. cenocepacia</i>                                         | Genome mining      | Other (Quorum sensing signaling molecule)       | [6]          |
|                       | BTH-II0204-207:A                                                       | <i>B. pseudomallei</i> K96243                                 | Genome mining      | Other (PDE4 inhibitor)                          | [7]          |
|                       | Sulfazecin                                                             | <i>P. acidophila</i> G-6302                                   | Bioactivity-guided | Antibacterial                                   | [8,9]        |
|                       | Glidopeptin A                                                          | <i>Burkholderiales</i> strain DSM 7029                        | Genome mining      | Cytotoxic                                       | [10]         |
|                       | Rhizomide A                                                            | <i>B. rhizoxinica</i> HKI 454                                 | Genome mining      | Cytotoxic                                       | [10]         |
|                       | Icosalides                                                             | <i>B. gladioli</i> HKI 0739                                   | Genome mining      | Antibiotic                                      | [11]         |
|                       | Ornibactins                                                            | Bcc                                                           | Bioactivity-guided | Iron chelating                                  | [3,12-14]    |
|                       | Rhizonins                                                              | <i>B. endofungorum</i> HKI456                                 | Bioactivity-guided | Toxin (Hepatotoxic)                             | [15-17]      |
|                       | Heptarhizin                                                            | <i>B. rhizoxinica</i> HKI454                                  | Genome mining      | Unknown                                         | [18]         |
|                       | FR900359                                                               | <i>Candidatus B. crenata</i>                                  | Genome mining      | Other (Gq-signaling inhibitor)                  | [19,20]      |
|                       | Haereogladsins and burriogladsins<br>Haereoglumin A and burrioglumin A | <i>B. gladioli</i> pv. <i>agaricicola</i><br><i>B. glumae</i> | Genome mining      | Swarming and biofilm formation                  | [21]         |
|                       | AFC-BC11*                                                              | <i>B. cepacia</i> BC11                                        | Bioactivity-guided | Antifungal                                      | [22]         |
|                       | Xylocandins                                                            | <i>B. cepacia</i> ATCC 39277                                  | Bioactivity-guided | Antifungal                                      | [23,24]      |
|                       | Gramibactin                                                            | <i>P. graminis</i> C4D1M                                      | Genome mining      | Iron chelating                                  | [25]         |
|                       | Malleonitrone                                                          | <i>B. thailandensis</i> E264                                  | Other              | Iron chelating, antibacterial                   | [26]         |
| Malleobactins         | <i>B. pseudomallei</i> group                                           | Bioactivity-guided                                            | Iron chelating     | [27-31]                                         |              |

|               |                                                                         |                                                    |                    |                                                |         |
|---------------|-------------------------------------------------------------------------|----------------------------------------------------|--------------------|------------------------------------------------|---------|
|               |                                                                         | <i>P. xenovorans</i> LB400                         | Genome mining      |                                                |         |
|               | Cepaciachelin                                                           | <i>B. cepacia</i> and <i>B. ambifaria</i> PHP7     | Bioactivity-guided | Iron chelating                                 | [12,32] |
|               | Holrhizin                                                               | <i>B./P. rhizoxinica</i> HKI 454                   | Genome mining      | Swarming and biofilm formation (Biosurfactant) | [33]    |
|               | Burkholdines                                                            | <i>B. ambifaria</i> 2.2N                           | Bioactivity-guided | Antifungal                                     | [34,35] |
|               | Occidiofungins                                                          | <i>B. contaminans</i> MS14                         | Bioactivity-guided | Antifungal                                     | [36-41] |
|               | Cepacidines                                                             | <i>B. cepacia</i> AF 2001                          | Bioactivity-guided | Antifungal                                     | [42-44] |
|               | Endolides                                                               | <i>B. contaminans</i>                              | Bioactivity-guided | Other (Vasopressin and serotonin receptor)     | [45-47] |
|               | Onychocin D                                                             | <i>B. contaminans</i>                              | Genome mining      | Not reported                                   | [45]    |
|               | Cyclo[N-(Lys-Phe)-Orn-Val]                                              | <i>B. cepacia</i>                                  | Other              | Not reported                                   | [48]    |
| Other/Unknown | 3-[L-alanyl-L-homoserinyl-L-aspartyl-β-carboxy]-4-hydroxy-5-oxopyrazole | <i>B. glumae</i>                                   | Bioactivity-guided | Antibacterial                                  | [49]    |
|               | Kirkamide                                                               | <i>Candidatus B. kirkii</i>                        | Genome-mining      | Cytotoxic, insecticidal                        | [50]    |
|               | (+)-Streptol glucoside & (+)-Streptol                                   | <i>Candidatus B. kirkii</i>                        | Bioactivity-guided | Other (Plant growth inhibitor)                 | [51]    |
|               | Sinapigliadoside                                                        | <i>B. gladioli</i> Lv-StA                          | Genome-mining      | Antifungal                                     | [52]    |
|               | Bulgecin A                                                              | <i>P. acidophila</i> G-6302ATTC 31363              | Bioactivity-guided | Antibacterial                                  | [53-55] |
|               | Rhizobitoxine                                                           | <i>B. andropogonis</i> strains                     | Bioactivity-guided | Other (Ethylene biosynthesis inhibitor)        | [56-58] |
|               | Iminopyrrolidines                                                       | <i>B. plantarii</i> 9424                           | Bioactivity-guided | Antibacterial                                  | [59]    |
|               | Cepaciamide A                                                           | <i>B. cepacia</i> D-202                            | Bioactivity-guided | Antifungal                                     | [60,61] |
|               | Cepabactin/BN-227                                                       | <i>B. cepacia</i> ATCC 25416, <i>B. sp.</i> BN-227 | Bioactivity-guided | Antibacterial, iron-chelating                  | [62-64] |
|               | Toxoflavin                                                              | <i>B. glumae</i> , <i>B. gladioli</i> HDXY-02      | Bioactivity-guided | Phytotoxic                                     | [65-67] |
|               | Arsinothricin                                                           | <i>B. gladioli</i> strain GSRB05                   | Bioactivity-guided | Not reported                                   | [68]    |
|               | 4-(2-hydroxyethoxy)-phenol                                              | <i>B. cenocepacia</i>                              | Other              | Not reported                                   | [69]    |

|                                         |                                                                                                                                            |                                         |                          |                                                                               |                           |
|-----------------------------------------|--------------------------------------------------------------------------------------------------------------------------------------------|-----------------------------------------|--------------------------|-------------------------------------------------------------------------------|---------------------------|
|                                         | Maculosin                                                                                                                                  | <i>B. cenocepacia</i>                   | Other                    | Not reported                                                                  | [ <sup>69</sup> ]         |
|                                         | Methyl Myristate                                                                                                                           | <i>B. cenocepacia</i>                   | Other                    | Not reported                                                                  | [ <sup>69</sup> ]         |
|                                         | Acylhomoserine lactones                                                                                                                    | <i>B. spp.</i>                          | Other (Structure-guided) | Other (Quorum sensing signal)                                                 | [ <sup>70-75</sup> ]      |
|                                         | Cepacian exopolysaccharide*                                                                                                                | Bcc                                     | Other                    | Other (Protects bacterial cells, virulence)                                   | [ <sup>76,77</sup> ]      |
|                                         | 2-O- $\alpha$ -L-rhamnopyranosyl- $\alpha$ -L-rhamnopyranosyl- $\alpha$ -(R)-3-hydroxytetradecanoyl-(R)-3-hydroxytetradecanoate (RL-2,214) | <i>B. plantarii</i>                     | Bioactivity-guided       | Toxin (Endotoxin)                                                             | [ <sup>78</sup> ]         |
| Hybrid polyketide-nonribosomal peptides | Thailandepsin A, also called Burkholdac B                                                                                                  | <i>B. thailandensis</i> E264            | Genome mining            | Cytotoxic (HDAC inhibitor, antitumor)                                         | [ <sup>70,79-84</sup> ]   |
|                                         | Spiruchostatin C                                                                                                                           | <i>B. thailandensis</i> E264            | Bioactivity-guided       | Cytotoxic (HDAC inhibitor)                                                    | [ <sup>85</sup> ]         |
|                                         | FK228                                                                                                                                      | <i>B. thailandensis</i> MSMB43          | Genome mining            | Cytotoxic (Anticancer)                                                        | [ <sup>86</sup> ]         |
|                                         | Spliceostatins (FR901464 and FR901465, spliceostatin A)                                                                                    | <i>B. sp.</i> FERM BP-3421              | Bioactivity-guided       | Cytotoxic (mRNA splicing inhibitor, antitumor)                                | [ <sup>87-92</sup> ]      |
|                                         | Thailanstatin A                                                                                                                            | <i>B. thailandensis</i> MSMB43          | Genome mining            | Cytotoxic (mRNA splicing inhibitor, antitumor)                                | [ <sup>91,93,94</sup> ]   |
|                                         | Glidobactin A                                                                                                                              | <i>Burkholderiales strain</i> DSM 7029  | Bioactivity-guided       | Cytotoxic, antifungal                                                         | [ <sup>95,96</sup> ]      |
|                                         | Cepafungin I                                                                                                                               | <i>B. cepacia</i>                       | Bioactivity-guided       | Cytotoxic, antifungal                                                         | [ <sup>97-99</sup> ]      |
|                                         | Bactobolins                                                                                                                                | <i>B. thailandensis</i> E264            | Genome mining            | Antibacterial                                                                 | [ <sup>70,100,101</sup> ] |
|                                         | Malleilactone / Burkholderic acid                                                                                                          | <i>B. thailandensis</i> E264            | Genome mining            | Cytotoxic, antibacterial, other (virulence factor, quorum-sensing regulation) | [ <sup>102, 103</sup> ]   |
|                                         | WF-1360F (rhizoxin precursor)                                                                                                              | <i>B. rhizoxinica</i> HKI454, <i>P.</i> | Bioactivity-guided       | Cytotoxic (Anticancer, tubulin inhibitor)                                     | [ <sup>104-114</sup> ]    |

|                           |                                                          |                                                                                         |                                                    |                                                                 |                        |
|---------------------------|----------------------------------------------------------|-----------------------------------------------------------------------------------------|----------------------------------------------------|-----------------------------------------------------------------|------------------------|
|                           |                                                          | <i>endofungorum</i><br>HKI456, and<br><i>Burkholderia</i> sp. B1,<br>B2, B3, B4, B7, B8 |                                                    |                                                                 |                        |
|                           | Thailandamides                                           | <i>B. thailandensis</i> E264                                                            | Genome mining                                      | Antibacterial (fatty acid biosynthesis inhibitor),<br>Cytotoxic | [ <sup>115-119</sup> ] |
|                           | Lagriamide                                               | <i>B. gladioli</i> Lv-StB                                                               | Bioactivity-guided                                 | Antifungal                                                      | [ <sup>120</sup> ]     |
|                           | Enacyloxin IIa                                           | <i>B. ambifaria</i> AMMD                                                                | Bioactivity-guided                                 | Antibacterial                                                   | [ <sup>121-124</sup> ] |
| Shikimate Pathway Derived | Tropolone                                                | <i>B. plantarii</i><br>MAFF301723                                                       | Bioactivity-guided                                 | Phytotoxin, antibacterial,<br>antifungal                        | [ <sup>125,126</sup> ] |
|                           | Salicylic acid (formerly<br>azurechelin)                 | <i>B. cepacia</i>                                                                       | Bioactivity-guided                                 | Iron-chelating                                                  | [ <sup>3,127</sup> ]   |
|                           | Pyrrolnitrins                                            | <i>B. cepacia</i> K87                                                                   | Bioactivity-guided                                 | Antifungal                                                      | [ <sup>128</sup> ]     |
|                           | Iodinin                                                  | <i>P. phenazinium</i>                                                                   | Bioactivity-guided                                 | Cytotoxic                                                       | [ <sup>129-133</sup> ] |
|                           | Pityriacitrin                                            | <i>B. sp.</i> NBF227                                                                    | Bioactivity-guided                                 | Cytotoxic                                                       | [ <sup>134,135</sup> ] |
|                           | 2-hydroxymethyl-<br>chroman-4-one                        | <i>Burkholderia</i> sp.<br>MSSP                                                         | Bioactivity-guided                                 | Antifungal                                                      | [ <sup>136</sup> ]     |
|                           | Burkholone                                               | <i>B. sp.</i> QN15488                                                                   | Bioactivity-guided                                 | Cytotoxic                                                       | [ <sup>137</sup> ]     |
|                           | 4-hydroxy-3-methyl-2-<br>(2-nonenyl)-quinoline<br>(HMNQ) | <i>B. thailandensis</i> E264                                                            | Bioactivity-guided                                 | Antibacterial                                                   | [ <sup>138</sup> ]     |
|                           | 2-heptyl-4(1H)-<br>quinolone N-oxide<br>(HQNO)           | <i>B. thailandensis</i> E264                                                            | Bioactivity-guided                                 | Antibacterial                                                   | [ <sup>138</sup> ]     |
|                           | 2-alkylquinolones                                        | <i>B. sp.</i> MBAF1239                                                                  | Bioactivity-guided                                 | Antibacterial                                                   | [ <sup>139</sup> ]     |
|                           | <i>N</i> -acyl-anthranilic acids                         | <i>B. thailandensis</i> E264                                                            | Other                                              | Cytotoxic, Other                                                | [ <sup>70,140</sup> ]  |
|                           | 4-Flavanone*                                             | <i>B. gladioli</i> pv.<br><i>agaricicola</i>                                            | Bioactivity-guided<br>(detected by GC-<br>MS only) | Antifungal                                                      | [ <sup>141</sup> ]     |
| Polyketides               | Gladiolin                                                | <i>B. gladioli</i> BCC0238                                                              | Bioactivity-guided                                 | Antibacterial<br>(antituberculosis)                             | [ <sup>142,143</sup> ] |
|                           | Bongkrekiic Acid                                         | <i>B. gladioli</i> pv.<br><i>cocovenenans</i>                                           | Bioactivity-guided                                 | Other (Mitochondrial<br>ATPase inhibitor)                       | [ <sup>144-147</sup> ] |
|                           | Lagriene                                                 | <i>B. gladioli</i> Lv-StA                                                               | Genome mining                                      | Antibacterial                                                   | [ <sup>52</sup> ]      |

|                                                                           |                                                        |                                                                                                                                                         |                                             |                                          |                        |
|---------------------------------------------------------------------------|--------------------------------------------------------|---------------------------------------------------------------------------------------------------------------------------------------------------------|---------------------------------------------|------------------------------------------|------------------------|
| Ribosomally Synthesized and Posttranslationally Modified Peptides (RiPPs) | Capistruin                                             | <i>B. thailandensis</i> E264                                                                                                                            | Genome mining                               | Antibacterial (RNA polymerase inhibitor) | [ <sup>148-150</sup> ] |
|                                                                           | Burhizin*                                              | <i>B. rhizoxinica</i> HKI 454                                                                                                                           | Genome mining, Detected only by LC/MS       | Not reported (compound not isolated)     | [ <sup>151,152</sup> ] |
| Polyynes                                                                  | Cepacins                                               | <i>B. cepacia</i> SC11783                                                                                                                               | Bioactivity-guided                          | Antibacterial                            | [ <sup>153,154</sup> ] |
|                                                                           | Caryoynencin                                           | <i>B. caryophylli</i> DSM50341<br><i>B. gladioli</i> pv. <i>cocovenenans</i> DMS11318                                                                   | Bioactivity-guided                          | Antibacterial                            | [ <sup>155,156</sup> ] |
| Terpenes                                                                  | Hopanoids                                              | <i>B. caryophylli</i> DSM 50341<br><i>B. gladioli</i> DSM 4245<br><i>Burkholderia</i> spp. strains G-21019, G-21027, G-22034, G-22009, G-22037, G-21032 | Other (Biomarkers for chemotaxonomy)        | Not reported                             | [ <sup>157</sup> ]     |
|                                                                           | d-limonene (1-methyl-4-(1-methylethenyl)-cyclohexene)* | <i>B. gladioli</i> pv. <i>agaricicola</i>                                                                                                               | Bioactivity-guided (detected by GC-MS only) | Antifungal                               | [ <sup>141</sup> ]     |

\* Denotes that chemical structure was not elucidated or that the compound was detected by mass spectrometry only.

**Table S2. Natural product BGCs detected in *Paraburkholderia* genomes**

| <i>Paraburkholderia</i> strains and NCBI RefSeq assembly accession codes | GC content (%) | size (Mb) | Number of chromosomes | Number of plasmids | Number of natural product BGCs | BGCs per Mb of genome |
|--------------------------------------------------------------------------|----------------|-----------|-----------------------|--------------------|--------------------------------|-----------------------|
| <b>Complete genomes</b>                                                  |                |           |                       |                    |                                |                       |
| <i>P. aromaticivorans</i> BN5<br>GCF_002278075.1                         | 62.9           | 8.9       | 2                     | 6                  | 10                             | 1.12                  |
| <i>P. caribensis</i><br>Bcrs1W GCF_001611015.1                           | 62.3           | 9.3       | 3                     | 0                  | 12                             | 1.29                  |
| MBA4 GCF_00522545.2                                                      | 62.5           | 9.5       | 2                     | 1                  | 13                             | 1.37                  |
| <i>P. phenoliruptrix</i> BR3459a<br>GCF_000300095.1                      | 63.1           | 7.7       | 2                     | 1                  | 9                              | 1.17                  |
| <i>P. phymatum</i> STM815<br>GCF_000020045.1                             | 62.2           | 8.7       | 2                     | 2                  | 11                             | 1.26                  |
| <i>P. phytofirmans</i> PsJN GCF_000020125.1                              | 62.3           | 8.2       | 2                     | 1                  | 11                             | 1.34                  |
| <i>P. sprentiae</i> WSM5005<br>GCF_001865575.1                           | 63.2           | 7.8       | 2                     | 3                  | 7                              | 0.90                  |
| <i>P. xenovorans</i> LB400 GCF_000013645.1                               | 62.6           | 9.7       | 2                     | 1                  | 10                             | 1.03                  |
| <b>Complete and draft genomes</b>                                        |                |           |                       |                    |                                |                       |
| <i>P. caledonica</i><br>NBRC 102488 GCF_000685095.1                      | 62.0           | 7.3       | draft genome          |                    | 9                              | 1.23                  |
| PHRS4 GCF_003330745.1                                                    | 61.9           | 7.2       | 2                     | 1                  | 7                              | 0.97                  |
| <i>P. fungorum</i><br>ATCC BAA-463 GCF_00961515.1                        | 61.8           | 9.1       | 3                     | 1                  | 11                             | 1.21                  |
| NBRC 102489 GCF_000685055.1                                              | 61.8           | 8.6       | draft genome          |                    | 14                             | 1.63                  |
| <i>P. graminis</i><br>PHS1 GCF_003330785.1                               | 62.8           | 7.5       | 2                     | 1                  | 8                              | 1.07                  |
| C4D1M GCF_000172415.1                                                    | 62.9           | 7.5       | draft genome          |                    | 8                              | 1.07                  |
| <i>P. hospita</i><br>DSM 17164 GCF_002902965.1                           | 62.8           | 11.5      | 6 replicons           |                    | 13                             | 1.13                  |
| mHSR1 GCA_003330805.1                                                    | 61.9           | 10.8      | 3                     | 1                  | 12                             | 1.11                  |
| <i>P. terrae</i><br>DSM 17804 GCF_002902925.1                            | 61.9           | 10.1      | 3                     | 1                  | 11                             | 1.09                  |
| NBRC 100964 GCF_000739835.1                                              | 62.0           | 9.9       | draft genome          |                    | 11                             | 1.11                  |
| <b>Draft genomes</b>                                                     |                |           |                       |                    |                                |                       |
| <i>P. acidipaludis</i> NBRC 101816<br>GCF_000684975.1                    | 65.2           | 6.5       | draft genome          |                    | 12                             | 1.85                  |
| <i>P. aspalathi</i> LMG 27731<br>GCF_900116445.1                         | 61.1           | 9.9       | draft genome          |                    | 13                             | 1.31                  |
| <i>P. bannensis</i> NBRC 103871<br>GCF_000685015.1                       | 64.0           | 8.6       | draft genome          |                    | 16                             | 1.86                  |
| <i>P. bryophila</i> 376MFSHa3.1<br>GCF_000383275.1                       | 61.9           | 7.7       | draft genome          |                    | 10                             | 1.30                  |
| <i>P. caballeronis</i> TNe-841<br>GCF_900104845.1                        | 67.0           | 7.1       | draft genome          |                    | 10                             | 1.41                  |
| <i>P. diazotrophica</i> LMG 26031<br>GCF_900108945.1                     | 63.0           | 8.6       | draft genome          |                    | 11                             | 1.28                  |
| <i>P. dilworthii</i> WSM3556<br>GCF_000472525.1                          | 61.8           | 7.7       | draft genome          |                    | 10                             | 1.30                  |
| <i>P. eburnea</i> JCM 18070<br>GCF_002917095.1                           | 64.1           | 6.9       | draft genome          |                    | 13                             | 1.88                  |
| <i>P. ferrariae</i> NBRC 106233<br>GCF_000685035.1                       | 64.9           | 7.9       | draft genome          |                    | 17                             | 2.15                  |

|                                                                              |               |              |              |      |           |
|------------------------------------------------------------------------------|---------------|--------------|--------------|------|-----------|
| <i>P. ginsengiterrae</i> DCY85-1<br>GCF_001645135.1                          | 62.5          | 8.5          | draft genome | 7    | 0.82      |
| <i>P. ginsengisoli</i> NBRC 100965<br>GCF_000739735.1                        | 63.6          | 6.5          | draft genome | 10   | 1.54      |
| <i>P. heleia</i> NBRC 101817<br>GCF_000739775.1                              | 64.6          | 8.0          | draft genome | 16   | 2.00      |
| <i>P. kururiensis</i><br>M130 GCF_00341045.1<br>NBRC 107107 GCF_000739795.1  | 65.1          | 6.8          | draft genome | 10   | 1.47      |
|                                                                              | 65.0          | 7.1          | draft genome | 13   | 1.83      |
| <i>P. megapolitana</i> LMG 23650<br>GCF_900113825.1                          | 62.1          | 7.6          | draft genome | 16   | 2.11      |
| <i>P. mimosarum</i><br>LMG 23256 GCF_000472825.1<br>STM 3621 GCF_000472845.1 | 63.9          | 8.4          | draft genome | 18   | 2.14      |
|                                                                              | 63.9          | 8.6          | draft genome | 16   | 1.86      |
| <i>P. monticola</i> JC2948 GCF_001580545.1                                   | 63.8          | 7.8          | draft genome | 6    | 0.77      |
| <i>P. oxyphila</i> NBRC 105797<br>GCF_000685075.1                            | 64.1          | 10.6         | draft genome | 17   | 1.60      |
| <i>P. nodosa</i><br>CNPSO 1341 GCF_001718195.1<br>DSM 21604 GCF_000519185.1  | 64.1          | 9.6          | draft genome | 16   | 1.67      |
|                                                                              | 64.2          | 8.6          | draft genome | 16   | 1.86      |
| <i>P. phenazinium</i> LMG 2247<br>GCF_900100735.1                            | 62.3          | 8.6          | draft genome | 19   | 2.21      |
| <i>P. ribeironis</i> STM7296<br>GCF_900019265.1                              | 62.5          | 7.3          | draft genome | 9    | 1.23      |
| <i>P. sacchari</i> LMG 19450<br>GCF_000785435.1                              | 64.0          | 7.3          | draft genome | 14   | 1.92      |
| <i>P. sartisoli</i> LMG 24000<br>GCF_900107685.1                             | 63.5          | 5.9          | draft genome | 9    | 1.53      |
| <i>P. tropica</i> P-31 GCF_001673675.1                                       | 64.7          | 8.9          | draft genome | 14   | 1.57      |
| <i>P. tuberum</i> WSM4176<br>GCF_000372945.1                                 | 62.9          | 9.1          | draft genome | 8    | 0.88      |
| <b>Average</b>                                                               | 63.1          | 8.3          |              | 12   | 1.43      |
| <b>Range</b>                                                                 | 61.1–<br>67.0 | 5.9–<br>11.5 |              | 6–19 | 0.77–2.21 |

## References

- (1) Sokol, P. A. *J. Clin. Microbiol.* **1986**, 23 (3), 560–562.
- (2) Quadri, L. E. N.; Keating, T. A.; Patel, H. M.; Walsh, C. T. *Biochemistry* **1999**, 38 (45), 14941–14954.
- (3) Darling, P.; Chan, M.; Cox, A. D.; Sokol, P. A. *Infect. Immun.* **1998**, 66 (2), 874–877.
- (4) Bukovits, G. J.; Mohr, N.; Budzikiewicz, H. *Zeitschrift für Naturforsch. B* **1982**, 37, 877–880.
- (5) Ye, L.; Cornelis, P.; Guillemin, K.; Ballet, S.; Hammerich, O. *Nat. Prod. Commun.* **2014**, 9, 789–794.
- (6) Jenul, C.; Sieber, S.; Daepfen, C.; Mathew, A.; Lardi, M.; Pessi, G.; Hoepfner, D.; Neuburger, M.; Linden, A.; Gademann, K.; Eberl, L. *Nat. Commun.* **2018**, 9, 1297.
- (7) Biggins, J. B.; Liu, X.; Feng, Z.; Brady, S. F. *J. Am. Chem. Soc.* **2011**, 133, 1638–1641.
- (8) Asai, M.; Haibara, K.; Muroi, M.; Kintaka, K.; Kishi, T. *J. Antibiot. (Tokyo)*. **1981**, 34, 621–627.
- (9) Li, R.; Oliver, R. A.; Townsend, C. A. *Cell Chem. Biol.* **2017**, 24, 24–34.
- (10) Wang, X.; Zhou, H.; Chen, H.; Jing, X.; Zheng, W.; Li, R.; Sun, T.; Liu, J.; Fu, J.; Huo, L.; Li, Y. Z.; Shen, Y.; Ding, X.; Müller, R.; Bian, X.; Zhang, Y. *Proc. Natl. Acad. Sci. U. S. A.* **2018**, 115, E4255–E4263.
- (11) Dose, B.; Niehs, S. P.; Scherlach, K.; Flórez, L. V.; Kaltenpoth, M.; Hertweck, C. *ACS Chem. Biol.* **2018**, 13, 2414–2420.
- (12) Agnoli, K.; Lowe, C. A.; Farmer, K. L.; Husnain, S. I.; Thomas, M. S. *J. Bacteriol.* **2006**, 188, 3631–3644.
- (13) Stephan, H.; Freund, S.; Meyer, J.-M.; Winkelmann, G.; Jung, G.; *Liebigs Ann. Der Chemie* **1993**, 1993, 43–48.
- (14) Stephan, H.; Freund, S.; Beck, W.; Jung, G.; Meyer, J.-M.; Winkelmann, G. *Biometals* **1993**, 6, 93–100.
- (15) Partida-Martinez, L. P.; Flores de Looss, C.; Ishida, K.; Ishida, M.; Roth, M.; Buder, K.; Hertweck, C.



- Appl. Environ. Microbiol.* **2007**, *73*, 793–797.
- (16) Steyn, P. S.; Tuinman, A. A.; van Heerden, F. R.; van Rooyen, P. H.; Wessels, P. L.; Rabie, C. J. *J. Chem. Soc. Chem. Commun.* **1983**, *136*, 47–49.
- (17) Wilson, T.; Rabie, C. J.; Fincham, J. E.; Steyn, P. S.; Schipper, M. A. *Food Chem. Toxicol.* **1984**, *22*, 275–281.
- (18) Niehs, S. P.; Dose, B.; Scherlach, K.; Roth, M.; Hertweck, C. *ChemBioChem* **2018**, *19*, 2167–2172.
- (19) Crüsemann, M.; Reher, R.; Schamari, I.; Brachmann, A. O.; Ohbayashi, T.; Kuschak, M.; Malfacini, D.; Seidinger, A.; Pinto-Carbó, M.; Richarz, R.; Reuter, T.; Kehraus, S.; Hallab, A.; Attwood, M.; Schiöth, H. B.; Mergaert, P.; Kikuchi, Y.; Schäberle, T. F.; Kostenis, E.; Wenzel, D.; Müller, C. E.; Piel, J.; Carlier, A.; Eberl, L.; König, G. M. *Angew. Chemie Int. Ed.* **2018**, *57*, 836–840.
- (20) Fujioka, M.; Koda, S.; Morimoto, Y.; Biemann, K. *J. Org. Chem.* **1988**, *53*, 2820–2825.
- (21) Thongkongkaew, T.; Ding, W.; Bratovanov, E.; Oueis, E.; García-Altare, M.; Zaburannyi, N.; Harmrolfs, K.; Zhang, Y.; Scherlach, K.; Müller, R.; Hertweck, C. *ACS Chem. Biol.* **2018**, *13*, 1370–1379.
- (22) Kang, Y.; Carlson, R.; Tharpe, W.; Schell, M. A. *Appl. Environ. Microbiol.* **1998**, *64*, 3939–3947.
- (23) Meyers, E.; Bisacchi, G. S.; Dean, L.; Liu, W. C.; Minassian, B.; Slusarchyk, D. S.; Sykes, R. B.; Tanaka, S. K.; Trejo, W. *J. Antibiot. (Tokyo)*. **1987**, *40*, 1515–1519.
- (24) Bisacchi, G. S.; Hockstein, D. R.; Koster, W. H.; Parker, W. L.; Rathnum, M. L.; Unger, S. E. *J. Antibiot. (Tokyo)*. **1987**, *40*, 1520–1529.
- (25) Hermenau, R.; Ishida, K.; Gama, S.; Hoffmann, B.; Pfeifer-Leeg, M.; Plass, W.; Mohr, J. F.; Wichard, T.; Saluz, H.-P.; Hertweck, C. *Nat. Chem. Biol.* **2018**, *14*, 841–843.
- (26) Trottmann, F.; Franke, J.; Ishida, K.; García-Altare, M.; Hertweck, C. *Angew. Chemie Int. Ed.* **2019**, *58*, 200–204.
- (27) Franke, J.; Ishida, K.; Hertweck, C. *Chem. Eur. J.* **2015**, *21*, 8010–8014.
- (28) Yang, H. M.; Chaowagul, W.; Sokol, P. A. *Infect. Immun.* **1991**, *59*, 776–780.
- (29) Vargas-Straube, M. J.; Cámara, B.; Tello, M.; Montero-Silva, F.; Cárdenas, F.; Seeger, M. *PLoS One* **2016**, *11*, e0151273.
- (30) Franke, J.; Ishida, K.; Ishida-Ito, M.; Hertweck, C. *Angew. Chemie Int. Ed.* **2013**, *52*, 8271–8275.
- (31) Franke, J.; Ishida, K.; Hertweck, C. *J. Am. Chem. Soc.* **2014**, *136*, 5599–5602.
- (32) Barelmann, I.; Meyer, J. -M.; Taraz, K. B. H. *Z Naturforsch* **1996**, *51C*, 627–630.
- (33) Niehs, S. P.; Scherlach, K.; Hertweck, C. *Org. Biomol. Chem.* **2018**, *16*, 8345–8352.
- (34) Tawfik, K. A.; Jeffs, P.; Bray, B.; Dubay, G.; Falkinham, J. O.; Mesbah, M.; Youssef, D.; Khalifa, S.; Schmidt, E. W. *Org. Lett.* **2010**, *12*, 664–666.
- (35) Lin, Z.; Falkinham, J. O.; Tawfik, K. A.; Jeffs, P.; Bray, B.; Dubay, G.; Cox, J. E.; Schmidt, E. W. *J. Nat. Prod.* **2012**, *75*, 1518–1523.
- (36) Gu, G.; Smith, L.; Liu, A.; Lu, S.-E. *Appl. Environ. Microbiol.* **2011**, *77*, 6189–6198.
- (37) Ravichandran, A.; Geng, M.; Hull, K. G.; Li, J.; Romo, D.; Lu, S.-E.; Albee, A.; Nutter, C.; Gordon, D. M.; Ghannoum, M. A.; Lockless, S.W.; Smith, L. *Antimicrob. Agents Chemother.* **2019**, *63*, e01585-18.
- (38) Lu, S.-E.; Novak, J.; Austin, F. W.; Gu, G.; Ellis, D.; Kirk, M.; Wilson-Stanford, S.; Tonelli, M.; Smith, L. *Biochemistry* **2009**, *48*, 8312–8321.
- (39) Ellis, D.; Gosai, J.; Emrick, C.; Heintz, R.; Romans, L.; Gordon, D.; Lu, S.-E.; Austin, F.; Smith, L. *Antimicrob. Agents Chemother.* **2012**, *56*, 765–769.
- (40) Chen, K.-C.; Ravichandran, A.; Guerrero, A.; Deng, P.; Baird, S. M.; Smith, L.; Lu, S.-E. *Appl. Environ. Microbiol.* **2013**, *79*, 2899–2905.
- (41) Gu, G.; Wang, N.; Chaney, N.; Smith, L.; Lu, S.-E. *FEMS Microbiol. Lett.* **2009**, *297*, 54–60.
- (42) Lee, C. H.; Kim, S.; Hyun, B.; Suh, J. W.; Yon, C.; Kim, C.; Lim, Y.; Kim, C. *J. Antibiot. (Tokyo)*. **1994**, *47*, 1402–1405.
- (43) Lim, Y.; Suh, J.-W.; Kim, S.; Hyun, B.; Kim, C.; Lee, C. *J. Antibiot. (Tokyo)*. **1994**, *47*, 1406–1416.
- (44) Lee, C.-H.; Suh, J. W.; Cho, Y.-H. *J. Microbiol. Biotechnol.* **1999**, *9*, 672–674.
- (45) Almeida, C.; Silva Pereira, C.; Gonzalez-Menendez, V.; Bills, G.; Pascual, J.; Sánchez-Hidalgo, M.; Kehraus, S.; Genilloud, O. *Appl. Environ. Microbiol.* **2018**, *84*, e00660-18.
- (46) Almeida, C.; El Maddah, F.; Kehraus, S.; Schnakenburg, G.; König, G. M. *Org. Lett.* **2016**, *18*, 528–531.
- (47) El Maddah, F.; Kehraus, S.; Nazir, M.; Almeida, C.; König, G. M. *J. Nat. Prod.* **2016**, *79*, 2838–2845.
- (48) Pérez-Picaso, L.; Rios, M. Y.; Hernández, A. N.; Martínez, J. *Magn. Reson. Chem.* **2006**, *44*, 959–961.
- (49) Mitchell, R. E.; Greenwood, D. R.; Sarojini, V. *Phytochemistry* **2008**, *69*, 2704–2707.
- (50) Sieber, S.; Carlier, A.; Neuburger, M.; Grabenweger, G.; Eberl, L.; Gademann, K. *Angew. Chemie Int. Ed.* **2015**, *54*, 7968–7970.
- (51) Hsiao, C.-C.; Sieber, S.; Georgiou, A.; Bailly, A.; Emmanouilidou, D.; Carlier, A.; Eberl, L.; Gademann, K. *Chem. Eur. J.* **2019**, *25*, 1722–1726.
- (52) Flórez, L. V.; Scherlach, K.; Gaube, P.; Ross, C.; Sitte, E.; Hermes, C.; Rodrigues, A.; Hertweck, C.; Kaltenpoth, M. *Nat. Commun.* **2017**, *8*, 15172.

- (53) Horsman, M. E.; Marous, D. R.; Li, R.; Oliver, R. A.; Byun, B.; Emrich, S. J.; Boggess, B.; Townsend, C. A.; Mobashery, S. *ACS Chem. Biol.* **2017**, *12*, 2552–2557.
- (54) Tomoshige, S.; Dik, D. A.; Akabane-Nakata, M.; Madukoma, C. S.; Fisher, J. F.; Shrout, J. D.; Mobashery, S. *ACS Infect. Dis.* **2018**, *4*, 860–867.
- (55) Shinagawa, S.; Kasahara, F.; Wada, Y.; Harada, S.; Asai, M. *Tetrahedron* **1984**, *40*, 3465–3470.
- (56) Mitchell, R. E.; Frey, E. *J. Physiol. Mol. Plant Pathol.* **1988**, *32*, 335–341.
- (57) Mitchell, R. E.; Coddington, J. M. *Phytochemistry* **1991**, *30*, 1809–1814.
- (58) Yasuta, T.; Satoh, S.; Minamisawa, K. *Appl. Environ. Microbiol.* **1999**, *65*, 849–852.
- (59) Mitchell, R. E.; Teh, K. L. *Org. Biomol. Chem.* **2005**, *3*, 3540–3543.
- (60) Jiao, Y.; Yoshihara, T.; Ishikuri, S.; Uchino, H.; Ichihara, A. *Tetrahedron Lett.* **1996**, *37*, 1039–1042.
- (61) Toshima, H.; Maru, K.; Saito, M.; Ichihara, A. *Tetrahedron* **1999**, *55*, 5793–5808.
- (62) Meyer, J.-M.; Hohnadel, D.; Hallé, F. *Microbiology* **1989**, *135*, 1479–1487.
- (63) Itoh, J.; Miyadoh, S.; Takahasi, S.; Amano, S.; Ezaki, N.; Yamada, Y. *J. Antibiot. (Tokyo)*. **1979**, *32*, 1089–1095.
- (64) Itoh, J.; Amano, S.; Ogawa, Y.; Kodama, Y.; Ezaki, N.; Yamada, Y. *J. Antibiot. (Tokyo)*. **1980**, *33*, 377–382.
- (65) Jeong, Y.; Kim, J.; Kim, S.; Kang, Y.; Nagamatsu, T.; Hwang, I. *Plant Dis.* **2003**, *87*, 890–895.
- (66) Suzuki, F.; Sawada, H.; Azegami, K.; Tsuchiya, K. *J. Gen. Plant Pathol.* **2004**, *70*, 97–107.
- (67) Li, X.; Li, Y.; Wang, R.; Wang, Q.; Lu, L. *Appl. Environ. Microbiol.* **2019**, *85*, e00106-19.
- (68) Kuramata, M.; Sakakibara, F.; Kataoka, R.; Yamazaki, K.; Baba, K.; Ishizaka, M.; Hiradate, S.; Kamo, T.; Ishikawa, S. *Environ. Chem.* **2016**, *13*, 723–731.
- (69) Yap, A.-C.; Chan, K.-G.; Choo, Y.-M. *Sains Malaysiana* **2016**, *45*, 1073–1077.
- (70) Mao, D.; Bushin, L. B.; Moon, K.; Wu, Y.; Seyedsayamdost, M. R. *Proc. Natl. Acad. Sci. U. S. A.* **2017**, *114*, E2920–E2928.
- (71) Duerkop, B. A.; Herman, J. P.; Ulrich, R. L.; Churchill, M. E. A.; Greenberg, E. P. *J. Bacteriol.* **2008**, *190*, 5137–5141.
- (72) Duerkop, B. A.; Ulrich, R. L.; Greenberg, E. P. *J. Bacteriol.* **2007**, *189*, 5034–5040.
- (73) Poonguzhali, S.; Madhaiyan, M.; Sa, T. *Res. Microbiol.* **2007**, *158*, 287–294.
- (74) Suárez-Moreno, Z. R.; Caballero-Mellado, J.; Venturi, V. *Microbiology* **2008**, *154*, 2048–2059.
- (75) Gotschlich, A.; Huber, B.; Geisenberger, O.; Tögl, A.; Steidle, A.; Riedel, K.; Hill, P.; Tümmler, B.; Vandamme, P.; Middleton, B.; Camara, M.; Williams, P.; Hardman, A.; Eberl, L. *Syst. Appl. Microbiol.* **2001**, *24*, 1–14.
- (76) Cescutti, P.; Foschiatti, M.; Furlanis, L.; Lagatolla, C.; Rizzo, R. *Carbohydr. Res.* **2010**, *345*, 1455–1460.
- (77) Ferreira, A. S.; Leitão, J. H.; Silva, I. N.; Pinheiro, P. F.; Sousa, S. A.; Ramos, C. G.; Moreira, L. M. *Appl. Environ. Microbiol.* **2010**, *76*, 441–450.
- (78) Andrä, J.; Rademann, J.; Howe, J.; Koch, M. H. J.; Heine, H.; Zähringer, U.; Brandenburg, K. *Biol. Chem.* **2006**, *387*, 301–310.
- (79) Wang, C.; Henkes, L. M.; Doughty, L. B.; He, M.; Wang, D.; Meyer-Almes, F.-J.; Cheng, Y.-Q. *J. Nat. Prod.* **2011**, *74*, 2031–2038.
- (80) Wang, C.; Flemming, C. J.; Cheng, Y.-Q. *Med. Chem. Commun.* **2012**, *3*, 976–981.
- (81) Jang, S.; Janssen, A.; Aburjania, Z.; Robers, M. B.; Harrison, A.; Dammalapati, A.; Cheng, Y.-Q.; Chen, H.; Jaskula-Sztul, R. *Oncotarget* **2017**, *8*, 70828–70840.
- (82) Biggins, J. B.; Gleber, C. D.; Brady, S. F. *Org. Lett.* **2011**, *13*, 1536–1539.
- (83) Wilson, A. J.; Cheng, Y.-Q.; Khabele, D. J. *Ovarian Res.* **2012**, *5*, 12.
- (84) Weinlander, E.; Somnay, Y.; Harrison, A. D.; Wang, C.; Cheng, Y.-Q.; Jaskula-Sztul, R.; Yu, X.-M.; Chen, H. *J. Surg. Res.* **2014**, *190*, 191–197.
- (85) Klausmeyer, P.; Shipley, S. M.; Zuck, K. M.; McCloud, T. G. *J. Nat. Prod.* **2011**, *74*, 2039–2044.
- (86) Liu, X.; Xie, F.; Doughty, L. B.; Wang, Q.; Zhang, L.; Liu, X.; Cheng, Y.-Q. *Synth. Syst. Biotechnol.* **2018**, *3*, 268–274.
- (87) Nakajima, H.; Sato, B.; Fujita, T.; Takase, S.; Terano, H.; Okuhara, M. *J. Antibiot. (Tokyo)*. **1996**, *49*, 1196–1203.
- (88) Nakajima, H.; Hori, Y.; Terano, H.; Okuhara, M.; Manda, T.; Matsumoto, S.; Shimomura, K. *J. Antibiot. (Tokyo)*. **1996**, *49*, 1204–1211.
- (89) Nakajima, H.; Hori, Y.; Terano, H.; Okuhara, M.; Manda, T.; Matsumoto, S.; Shimomura, K. *J. Antibiot. (Tokyo)*. **1996**, *49*, 1204–1211.
- (90) Zhang, F.; He, H.-Y.; Tang, M.-C.; Tang, Y.-M.; Zhou, Q.; Tang, G.-L. *J. Am. Chem. Soc.* **2011**, *133*, 2452–2462.
- (91) He, H.; Ratnayake, A. S.; Janso, J. E.; He, M.; Yang, H. Y.; Loganzo, F.; Shor, B.; O'Donnell, C. J.; Koehn, F. E. *J. Nat. Prod.* **2014**, *77*, 1864–1870.

- (92) Kaida, D.; Motoyoshi, H.; Tashiro, E.; Nojima, T.; Hagiwara, M.; Ishigami, K.; Watanabe, H.; Kitahara, T.; Yoshida, T.; Nakajima, H.; et al. *Nat. Chem. Biol.* **2007**, *3*, 576–583.
- (93) Liu, X.; Biswas, S.; Berg, M. G.; Antapli, C. M.; Xie, F.; Wang, Q.; Tang, M.-C.; Tang, G.-L.; Zhang, L.; Dreyfuss, G.; Cheng, Y.-Q. *J. Nat. Prod.* **2013**, *76*, 685–693.
- (94) Ghosh, A. K.; Veitschegger, A. M.; Nie, S.; Relitti, N.; MacRae, A. J.; Jurica, M. S. *J. Org. Chem.* **2018**, *83*, 5187–5198.
- (95) Oka, M.; Nishiyama, Y.; Ohta, S.; Kamei, H.; Konishi, M.; Miyaki, T.; Oki, T.; Kawaguchi, H. *J. Antibiot. (Tokyo)*. **1988**, *41*, 1331–1337.
- (96) Schellenberg, B.; Bigler, L.; Dudler, R. *Environ. Microbiol.* **2007**, *9*, 1640–1650.
- (97) Shoji, J.; Hinoo, H.; Kato, T.; Hattori, T.; Hirooka, K.; Tawara, K.; Shiratori, O.; Terui, Y. *J. Antibiot. (Tokyo)*. **1990**, *43*, 783–787.
- (98) Terui, Y.; Nishikawa, J.; Hinoo, H.; Kato, T.; Shoji, J. *J. Antibiot. (Tokyo)*. **1990**, *43*, 788–795.
- (99) Krahn, D.; Ottmann, C.; Kaiser, M. *Nat. Prod. Rep.* **2011**, *28*, 1854–1867.
- (100) Kondo, S.; Horiuchi, Y.; Hamada, M.; Takeuchi, T.; Umezawa, H. *J. Antibiot. (Tokyo)*. **1979**, *32*, 1069–1071.
- (101) Seyedsayamdost, M. R.; Chandler, J. R.; Blodgett, J. A. V.; Lima, P. S.; Duerkop, B. A.; Oinuma, K.-I.; Greenberg, E. P.; Clardy, J. *Org. Lett.* **2010**, *12*, 716–719.
- (102) Biggins, J. B.; Ternei, M. A.; Brady, S. F. *J. Am. Chem. Soc.* **2012**, *134*, 13192–13195.
- (103) Franke, J.; Ishida, K.; Hertweck, C. *Angew. Chemie Int. Ed.* **2012**, *51*, 11611–11615.
- (104) Partida-Martinez, L. P.; Hertweck, C. *ChemBioChem* **2007**, *8*, 41–45.
- (105) Partida-Martinez, L. P.; Hertweck, C. *Nature* **2005**, *437*, 884–888.
- (106) Scherlach, K.; Busch, B.; Lackner, G.; Paszkowski, U.; Hertweck, C. *Angew. Chemie Int. Ed.* **2012**, *51*, 9615–9618.
- (107) Scherlach, K.; Partida-Martinez, L. P.; Dahse, H.-M.; Hertweck, C. *J. Am. Chem. Soc.* **2006**, *128*, 11529–11536.
- (108) Scherlach, K.; Brendel, N.; Ishida, K.; Dahse, H.-M.; Hertweck, C. *Org. Biomol. Chem.* **2012**, *10*, 5756–5759.
- (109) McLeod, H. L.; Murray, L. S.; Wanders, J.; Setanoians, A.; Graham, M. A.; Pavlidis, N.; Heinrich, B.; ten Bokkel Huinink, W. W.; Wagener, D. J.; Aamdal, S.; Verweij, J. *Br. J. Cancer* **1996**, *74*, 1944–1948.
- (110) Fox, B. W. *Ann. Oncol.* **1992**, *3*, 707–709.
- (111) Bissett, D.; Graham, M. A.; Setanoians, A.; Chadwick, G. A.; Wilson, P.; Koier, I.; Henrar, R.; Schwartzmann, G.; Cassidy, J.; Kaye, S. B. *Cancer Res.* **1992**, *52*, 2894–2898.
- (112) Takahashi, M.; Iwasaki, S.; Kobayashi, H.; Okuda, S.; Murai, T.; Sato, Y. *Biochim. Biophys. Acta* **1987**, *926*, 215–223.
- (113) Tsuruo, T.; Oh-hara, T.; Iida, H.; Tsukagoshi, S.; Sato, Z.; Matsuda, I.; Iwasaki, S.; Okuda, S.; Shimizu, F.; Sasagawa, K. *Cancer Res.* **1986**, *46*, 381–385.
- (114) Iwasaki, S.; Kobayashi, H.; Furukawa, J.; Namikoshi, M.; Okuda, S.; Sato, Z.; Matsuda, I.; Noda, T. *J. Antibiot. (Tokyo)*. **1984**, *37*, 354–362.
- (115) Ishida, K.; Lincke, T.; Hertweck, C. *Angew. Chemie Int. Ed.* **2012**, *51*, 5470–5474.
- (116) Wu, Y.; Seyedsayamdost, M. R. *Biochemistry* **2018**, *57*, 4247–4251.
- (117) Wozniak, C. E.; Lin, Z.; Schmidt, E. W.; Hughes, K. T.; Liou, T. G. *Antimicrob. Agents Chemother.* **2018**, *62*, 401–408.
- (118) Nguyen, T.; Ishida, K.; Jenke-Kodama, H.; Dittmann, E.; Gurgui, C.; Hochmuth, T.; Taudien, S.; Platzer, M.; Hertweck, C.; Piel, J. *Nat. Biotechnol.* **2008**, *26*, 225–233.
- (119) Ishida, K.; Lincke, T.; Behnken, S.; Hertweck, C. *J. Am. Chem. Soc.* **2010**, *132*, 13966–13968.
- (120) Flórez, L. V.; Scherlach, K.; Miller, I. J.; Rodrigues, A.; Kwan, J. C.; Hertweck, C.; Kaltenpoth, M. *Nat. Commun.* **2018**, *9*, 2478.
- (121) Mahenthiralingam, E.; Song, L.; Sass, A.; White, J.; Wilmot, C.; Marchbank, A.; Boaisa, O.; Paine, J.; Knight, D.; Challis, G. L. *Chem. Biol.* **2011**, *18*, 665–677.
- (122) Parmeggiani, A.; Krab, I. M.; Watanabe, T.; Nielsen, R. C.; Dahlberg, C.; Nyborg, J.; Nissen, P. *J. Biol. Chem.* **2006**, *281*, 2893–2900.
- (123) Cetin, R.; Krab, I. M.; Anborgh, P. H.; Cool, R. H.; Watanabe, T.; Sugiyama, T.; Izaki, K.; Parmeggiani, A. *EMBO J.* **1996**, *15*, 2604–2611.
- (124) Ross, C.; Opel, V.; Scherlach, K.; Hertweck, C. *Mycoses* **2014**, *57*, 48–55.
- (125) Azegami, K.; Nishiyama, K.; Watanabe, Y.; Suzuki, T.; Yoshida, M.; Nose, K.; Toda, S. *Ann. Phytopath. Soc. Japan* **1985**, *51*, 315–317.
- (126) Wang, M.; Tachibana, S.; Murai, Y.; Li, L.; Lau, S. Y. L.; Cao, M.; Zhu, G.; Hashimoto, M.; Hashidoko, Y. *Sci. Rep.* **2016**, *6*, 22596.
- (127) Sokol, P. A.; Lewis, C. J.; Dennis, J. J. *J. Med. Microbiol.* **1992**, *36*, 184–189.
- (128) Sultan, M. Z.; Park, K.; Lee, S. Y.; Park, J. K.; Varughese, T.; Moon, S.-S. *J. Antibiot. (Tokyo)*. **2008**, *61*,

- 420–425.
- (129) Bell, S. C.; Turner, J. M. *Biochem. Soc. Trans.* **1973**, *1*, 751–753.
- (130) Byng, G. S.; Turner, J. M. *Biochem. J.* **1977**, *164*, 139–145.
- (131) Hollstein, U.; McCamey, D. A. *J. Org. Chem.* **1973**, *38*, 3415–3417.
- (132) Byng, G. S.; Turner, J. M. *J. Gen. Microbiol.* **1976**, *97*, 57–62.
- (133) Viktorsson, E. Ö.; Melling Grøthe, B.; Aesoy, R.; Sabir, M.; Snellingen, S.; Prandina, A.; Høgmoen Åstrand, O. A.; Bonge-Hansen, T.; Døskeland, S. O.; Herfindal, L.; Rongved, P. *Bioorg. Med. Chem.* **2017**, *25*, 2285–2293.
- (134) Xu, T.; Shi, L.; Zhang, Y.; Wang, K.; Yang, Z.; Ke, S. *Eur. J. Med. Chem.* **2019**, *168*, 293–300.
- (135) Zuther, K.; Mayser, P.; Hettwer, U.; Wu, W.; Spitteller, P.; Kindler, B. L. J.; Karlovsky, P.; Basse, C. W.; Schirawski, J. *Mol. Microbiol.* **2008**, *68*, 152–172.
- (136) Kang, J. G.; Shin, S. Y.; Kim, M. J.; Bajpai, V.; Maheshwari, D. K.; Kang, S. C. *J. Antibiot. (Tokyo)*. **2004**, *57*, 726–731.
- (137) Mori, T.; Yamashita, T.; Furihata, K.; Nagai, K.; Suzuki, K.; Hayakawa, Y.; Shin-ya, K. *J. Antibiot. (Tokyo)*. **2007**, *60*, 713–716.
- (138) Wu, Y.; Seyedsayamdost, M. R. *Cell Chem. Biol.* **2017**, *24*, 1437–1444.e3.
- (139) Li, D.; Oku, N.; Hasada, A.; Shimizu, M.; Igarashi, Y. *Beilstein J. Org. Chem.* **2018**, *14*, 1446–1451.
- (140) Park, W. J.; Ma, E. *Arch Pharm Res* **2012**, *35*, 1379–1386.
- (141) Elshafie, H. S.; Bufo, S. A.; Racioppi, R.; Camele, I. *Int. J. Drug Discov.* **2013**, *5*, 181–184.
- (142) Song, L.; Jenner, M.; Masschelein, J.; Jones, C.; Bull, M. J.; Harris, S. R.; Hartkoorn, R. C.; Vocat, A.; Romero-Canelon, I.; Coupland, P.; Webster, G.; Dunn, M.; Weiser, R.; Paisey, C.; Cole, S. T.; Parkhill, J.; Mahenthiralingam, E.; Challis, G. L. *J. Am. Chem. Soc.* **2017**, *139*, 7974–7981.
- (143) Perry, C.; Sargeant, J. R.; Song, L.; Challis, G. L. *Tetrahedron* **2018**, *74*, 5150–5155.
- (144) Hu, W. J.; Chen, X. M.; Meng, H. D.; Meng, Z. H. *Biomed. Environ. Sci.* **1989**, *2*, 65–71.
- (145) Rohm, B.; Scherlach, K.; Hertweck, C. *Org. Biomol. Chem.* **2010**, *8*, 1520–1522.
- (146) de Bruijn, J.; Frost, D. J.; Nugteren, D. H.; Gaudemer, A.; Lijmbach, G. W. M.; Cox, H. C.; Berends, W. *Tetrahedron* **1973**, *29*, 1541–1547.
- (147) Moebius, N.; Ross, C.; Scherlach, K.; Rohm, B.; Roth, M.; Hertweck, C. *Chem. Biol.* **2012**, *19*, 1164–1174.
- (148) Knappe, T. A.; Linne, U.; Zirah, S.; Rebuffat, S.; Xie, X.; Marahiel, M. A. *J. Am. Chem. Soc.* **2008**, *130*, 11446–11454.
- (149) Knappe, T. A.; Linne, U.; Robbel, L.; Marahiel, M. A. *Chem. Biol.* **2009**, *16*, 1290–1298.
- (150) Kuznedelov, K.; Semenova, E.; Knappe, T. A.; Mukhamedyarov, D.; Srivastava, A.; Chatterjee, S.; Ebright, R. H.; Marahiel, M. A.; Severinov, K. *J. Mol. Biol.* **2011**, *412*, 842–848.
- (151) Hegemann, J. D.; Zimmermann, M.; Zhu, S.; Klug, D.; Marahiel, M. A. *Biopolymers* **2013**, *100*, 527–542.
- (152) Estrada-de los Santos, P.; Palmer, M.; Chávez-Ramírez, B.; Beukes, C.; Steenkamp, E.; Briscoe, L.; Khan, N.; Maluk, M.; Lafos, M.; Humm, E.; Arrabit, M.; Crook, M.; Gross, E.; Simon, M. F.; dos Reis Junior, F. B.; Whitman, W. B.; Shapiro, N.; Poole, P. S.; Hirsch, A. M.; Venter, S. N.; James, E. K. *Genes (Basel)*. **2018**, *9*, 389.
- (153) Parker, W. L.; Rathnum, M. L.; Seiner, V.; Trejo, W. H.; Principe, P. A.; Sykes, R. B. *J. Antibiot. (Tokyo)*. **1984**, *37*, 431–440.
- (154) Mullins, A. J.; Murray, J. A. H.; Bull, M. J.; Jenner, M.; Jones, C.; Webster, G.; Green, A. E.; Neill, D. R.; Connor, T. R.; Parkhill, J.; Challis, G. L.; Mahenthiralingam, E. *Nat. Microbiol.* **2019**, *4*, 996–1005.
- (155) Kusumi, T.; Ohtani, I.; Nishiyama, K., and Kakisawa, H. *Tetrahedron Lett.* **1987**, *28*, 3981–3984.
- (156) Ross, C.; Scherlach, K.; Kloss, F.; Hertweck, C. *Angew. Chemie Int. Ed.* **2014**, *53*, 7794–7798.
- (157) Cvejic, J. H.; Putra, S. R.; El-Beltagy, A.; Hattori, R.; Hattori, T.; Rohmer, M. *FEMS Microbiol. Lett.* **2000**, *183*, 295–299.
